# Supplementary material for: Profile of fibrosis-related gene transcripts and megakaryocytic changes in the bone marrow of myelodysplastic syndromes with fibrosis
Source: Springer Nature journal article supplement (doi:10.1007/s00277-018-3411-9), 2018-06-30
Supplement: MOESM15 [file 15896936]

**Supplementary table 3**

| **Gene** | **MDS-MF2/3 (n=26)** | **MDS-MF1 (n=38)** | **MDS-MF0 (n=49)** | **Controls (n=33)** | **BMFB**  **(n=3)** | **KG1**  **(n=3)** | **KG1+**  **BMFB (n=3)** |
| --- | --- | --- | --- | --- | --- | --- | --- |
| ANGPT1 | 0.069 | 0.039 | 0.025 | 0.014 | 0.452 | 1.104 | 1.377 |
| BMP4 | 0.020 | 0.024 | 0.009 | 0.021 | 0.173 | 0.006 | 0.026 |
| BMPR2 | 0.013 | 0.008 | 0.008 | 0.005 | 0.528 | 0.001 | 0.099 |
| CCL3 | 0.103 | 0.079 | 0.041 | 0.031 | 0.005 | 0.013 | 0.032 |
| CCL5 | 0.510 | 0.375 | 0.251 | 0.180 | 0.009 | 4.753 | 15.397 |
| CCL8 | 0.034 | 0.017 | 0.011 | 0.008 | 0.004 | ND | ND |
| CSF3R | 0.340 | 0.241 | 0.500 | 0.571 | ND | 1.960 | 1.961 |
| CTGF | 0.104 | 0.071 | 0.037 | 0.035 | 81.652 | 0.001 | 18.821 |
| CXCL12 | 2.124 | 2.075 | 1.504 | 1.419 | 44.274 | ND | 3.053 |
| CXCL13 | 0.023 | 0.009 | 0.009 | 0.005 | ND | ND | ND |
| CXCR1 | 0.047 | 0.031 | 0.040 | 0.112 | ND | ND | ND |
| CXCR2 | 0.019 | 0.011 | 0.028 | 0.043 | ND | 0.055 | 0.171 |
| CXCR4 | 0.095 | 0.068 | 0.115 | 0.164 | ND | 1.608 | 2.005 |
| EDN1 | 0.027 | 0.018 | 0.011 | 0.015 | 0.151 | 0.006 | 0.038 |
| FGFR1 | 0.503 | 0.225 | 0.170 | 0.173 | 1.818 | 1.069 | 0.764 |
| HGF | 0.016 | 0.008 | 0.007 | 0.005 | 0.411 | 6.258 | 12.040 |
| IL2RA | 0.026 | 0.020 | 0.012 | 0.008 | ND | 0.240 | 2.432 |
| IL6 | 0.017 | 0.008 | 0.007 | 0.007 | 2.579 | ND | 4.806 |
| LOX | 0.036 | 0.024 | 0.011 | 0.013 | 67.750 | 0.008 | 14.338 |
| MDK | 0.013 | 0.010 | 0.007 | 0.003 | 1.898 | 1.683 | 3.458 |
| MMP2 | 0.156 | 0.072 | 0.022 | 0.021 | 42.922 | 0.389 | 2.985 |
| MMP9 | 2.319 | 2.098 | 2.591 | 7.259 | 0.002 | 0.116 | 0.031 |
| MMP11 | 0.009 | 0.004 | 0.003 | 0.001 | 0.017 | 0.002 | 0.006 |
| MMP13 | 0.009 | 0.003 | 0.002 | 0.001 | 0.006 | ND | 0.025 |
| MMP14 | 0.091 | 0.049 | 0.033 | 0.028 | 13.360 | 0.038 | 2.173 |
| MYH9 | 0.671 | 1.082 | 0.498 | 0.580 | 81.865 | ND | 11.693 |
| MYLK | 0.166 | 0.074 | 0.034 | 0.035 | 0.805 | ND | 0.166 |
| NRP1 | 0.015 | 0.007 | 0.005 | 0.011 | 2.260 | 0.006 | 0.212 |
| PDGFA | 0.008 | 0.005 | 0.004 | 0.002 | 1.583 | 1.038 | 1.541 |
| PDPN | 0.047 | 0.054 | 0.016 | 0.031 | 0.072 | 0.001 | 0.025 |
| PECAM1 | 1.010 | 0.663 | 0.491 | 0.487 | 0.060 | 5.747 | 7.354 |
| PLAT | 0.039 | 0.030 | 0.016 | 0.023 | 0.456 | ND | 0.050 |
| PTGS1 | 0.033 | 0.023 | 0.023 | 0.007 | 0.030 | 0.993 | 1.341 |
| PTK2 | 0.073 | 0.054 | 0.048 | 0.032 | 0.739 | 3.587 | 5.010 |
| SERPINE1 | 0.071 | 0.022 | 0.011 | 0.010 | 60.558 | 0.019 | 23.634 |
| SERPINF1 | 0.202 | 0.079 | 0.046 | 0.023 | 1.562 | 0.004 | 0.135 |
| SMAD1 | 0.127 | 0.050 | 0.046 | 0.037 | 0.355 | 0.176 | 0.395 |
| SMAD3 | 0.232 | 0.143 | 0.141 | 0.124 | 2.469 | 3.475 | 5.278 |
| SMAD4 | 0.031 | 0.020 | 0.037 | 0.017 | 1.986 | 3.594 | 5.081 |
| TEK | 0.037 | 0.030 | 0.020 | 0.017 | 0.604 | 0.031 | 0.257 |
| TGFB1 | 2.600 | 1.805 | 1.271 | 1.168 | 18.765 | 22.797 | 22.078 |
| THBS1 | 8.127 | 5.254 | 2.510 | 1.452 | 510.964 | 0.003 | 52.634 |
| TIE 1 | 0.007 | 0.006 | 0.003 | 0.003 | ND | 0.510 | 0.653 |
| TIMP1 | 1.836 | 0.767 | 0.375 | 0.256 | 65.650 | 5.299 | 39.424 |
| TNF | 0.004 | 0.004 | 0.003 | 0.002 | ND | 0.021 | 0.009 |

**Legend to supplementary table 3**

**Gene expression profile of 45 mRNA transcripts in bone marrow samples from MDS with different grades of fibrosis and MDS without fibrosis.** Gene expression has been analysed in 26 MDS-MF2 (1/26 RARS, 8/26 RCMD, 8/26 RAEB1, 9/26 RAEB2), 38 MDS-MF1 (4/38 RARS, 13/38 RCMD, 4/38 MDS-del(5q), 8/38 RAEB1, 9/38 RAEB2), 49 MDS-MF0 (8/49 RARS, 13/49 RCMD MDS, 4/49 MDS-del(5q), 12/49 RAEB1, 12/49 RAEB2) and 33 controls. In addition to these *in situ*-derived data, *in vitro* experiments represent neoplastic haematopoiesis (KG1 cells) and stroma (primary bone marrow fibroblasts/BMFB). Mean relative expression levels are listed for patient samples and three independent cell cultures. Abbreviation: not detectable (ND).
