# Supplementary material for: Profile of fibrosis-related gene transcripts and megakaryocytic changes in the bone marrow of myelodysplastic syndromes with fibrosis
Source: Springer Nature journal article supplement (doi:10.1007/s00277-018-3411-9), 2018-06-30
Supplement: MOESM18 [file 15896936]

**Supplementary table 6**

| **Case** | **Diagnosis (months since diagnosis),**  **mutation status (if mutated)** | **CD42b pro-platelet at the MF0 and MF stage** |
| --- | --- | --- |
| #2 | RAEB/AML-MF0 (+4) > RAEB2-MF2 (+18)  JAK2wildtype > JAK2V617F (37%) | PP0 > PP2-3 |
| #5 | RAEB1-MF0 (+8) > RAEB2-MF1 (+32)  (JAK2V617F at diagnosis) > JAK2V617F (51%) | PP1-2 > PP2 |
| #6 | RAEB1-MF0 (0) > RAEB2-MF1 (+33) SRSF2P95L > SRSF2P95L | PP1-2 > PP1-2 |
| #12 | RCMD-MF0 (0) > RAEB2-MF2 (+6) | PP0 > PP2 |
| #13 | RCMD-MF0 (0) > RCMD-MF2 (+8) | PP0 > PP2 |
| #14 | RCMD-MF0 (0) > RAEB2-MF1 (+24) | PP2 > PP2 |
| #15 | RAEB2-MF0 (0) > RAEB2-MF1 (+6) | PP1 > PP1 |
| #16 | RCMD-MF0 (0) > RCMD-MF1 (+16) | PP1 > PP3 |
| #18 | RCMD-MF0 (0) > RCMD-MF1 (+79) | PP0 > PP1 |
| #19 | RCMD-MF0 (0) > RCMD-MF1 (+23) | PP0-1 > PP0-1 |

**Legend to supplementary table 6**

**Increased pro-platelet deposition in a subfraction of MDS follow-up cases**

Pro-platelet deposition (PP) was graded as follows: PP0 (≤1 megakaryocyte/1 HPF with CD42b+ pro-platelets longer than the corresponding largest megakaryocytic cell body diameter and no prominent intersection of pro-platelets of adjacent megakaryocytes; loose platelets in the interstitium); PP1 (>1 megakaryocyte/1 HPF with CD42b+ pro-platelets longer than the corresponding largest megakaryocytic cell body diameter and no prominent intersection of pro-platelets of adjacent megakaryocytes; loose platelets in the interstitium); PP2 (loose network of intersecting pro-platelets of adjacent megakaryocytes and loose platelets in the interstitium); PP3 (diffuse and dense network of intersecting pro-platelets of adjacent megakaryocytes and dense and diffuse platelet depositions in the interstitium).
